# 1 Concatenated 16S rRNA Sequence Analysis Improve Bacterial Taxonomy

2 Bobby Paul

3 Department of Bioinformatics, Manipal School of Life Sciences, Manipal Academy of Higher  
4 Education, Manipal-576104, Karnataka, India

5 **Email:** bobby.paul@manipal.edu

## 6 **Abstract**

7  
8 Microscopic, biochemical, molecular, and computer-based approaches are extensively used to  
9 identify and classify bacterial populations. Further, advances in DNA sequencing and  
10 bioinformatics workflows facilitated sophisticated genome-based methods for microbial  
11 taxonomy. Although sequencing of 16S rRNA gene is widely employed to identify and classify  
12 the bacterial community as a cost-effective and single-gene approach. However, the accuracy  
13 of the 16S rRNA sequence-based species identification is limited by multiple copies of the gene  
14 and their higher sequence identity between closely related species. Availability of a large  
15 volume of bacterial whole-genome data provided an opportunity to develop comprehensive  
16 species-specific 16S rRNA reference libraries. With defined rules, we have concatenated four  
17 16S rRNA gene copy variants to develop a species-specific reference library. Using this  
18 approach, species-specific 16S rRNA gene libraries were developed for four closely  
19 related *Streptococcus* species (*S. gordonii*, *S. mitis*, *S. oralis*, and *S. pneumoniae*). Sequence  
20 similarity and phylogenetic analysis of concatenated 16S rRNA copies yielded better resolution  
21 than single gene copy approaches. The approach is very effective to classify genetically related  
22 species, and it may reduce misclassification of bacterial species and genome assemblies.

23  
24 **Keywords:** Bacterial nomenclature; Bacterial taxonomy; Concatenated phylogeny; Species-  
25 specific barcode reference library

## 26 **Introduction**

27 The 16S ribosomal RNA (16S rRNA) encoding region is extensively studied to identify and  
28 classify bacterial species. The 16S rRNA is a conserved component of the 30S small subunit  
29 of a prokaryotic ribosome. The gene is ~1500 base pair (bp) long, and it consists of nine  
30 variable regions (Reller et al. 2007; Sabat et al. 2017). For decades, the sequence of 16S rRNA  
31 has been used as a potential molecular marker in culture-independent methods to identify and  
32 classify diverse bacterial communities (Clarridge, 2004; Johnson et al. 2019). The 16S rRNA  
33 sequences are currently being used as an accurate and rapid method to study bacterial evolution,  
34 phylogenetic relationships, populations in an environment, and quantification of abundant taxa  
35 (Vetrovsky and Baldrian, 2013; Srinivasan et al. 2015; Peker et al. 2019).

36 Despite the wide range of applications, few shortcomings limit the accuracy of results  
37 derived through the 16S rRNA sequence analysis. One such aspect is that the 16S rRNA gene  
38 has poor discriminatory power at the species level (Winand et al. 2020), and the copy number  
39 can vary from 1 to 15 or even more (Vetrovsky and Baldrian, 2013; Winand et al. 2020). The  
40 presence of multiple variable copies of this gene makes distinct data for a species. Hence, gene  
41 copy normalization (GCN) is necessary prior to the sequence analysis. However, studies show  
42 that the GCN approach does not improve the 16S rRNA sequence analyses in real scenarios  
43 and suggests a comprehensive species-specific catalogue of gene copies (Starke et al. 2021).  
44 Secondly, the intra-genomic variations between the 16S rRNA gene copies were observed in  
45 several bacterial genome assemblies (Paul et al. 2019). Only a minority of the bacterial  
46 genomes harbor identical 16S rRNA gene copies, and sequence diversity increases with  
47 increasing copy numbers (Vetrovsky and Baldrian, 2013). Further, currently available 16S  
48 rRNA-based bioinformatics approaches are not always amenable to classify bacterium at the  
49 species level due to high inter-species sequence similarities (Peker et al. 2019; Deurenberg et  
50 al. 2017).

51 A few other issues are also related to the sequencing and bioinformatics analysis of 16S  
52 rRNA gene regions. These include the purity of bacterial isolates, the quality of isolated DNA,  
53 and the possibility of chimeric molecules (Janda and Abbott, 2007; Church et al. 2020). Base-  
54 call errors can also mislead the sequence identity and phylogenetic inferences (Alachiotis et al.  
55 2013). The other concerns on sequence-based analysis, comparison, and species identification  
56 include the number of base ambiguities processed, gaps generated during sequence  
57 comparison, and algorithm (local or global) used for the sequence alignment. The local  
58 alignment algorithm is extensively used for sequence similarity based species identification.  
59 Several studies were conducted to identify the best variable region or combination of variable  
60 regions for bacterial classification, and a consensus remains to be implemented (Janda and  
61 Abbott, 2007; Johnson et al. 2019; Winand et al. 2020). Usage of misclassified sequence as a  
62 reference and improper bioinformatics workflows mislead the bacterial taxonomy. Further, the  
63 growth of bioinformatics and genetic data has placed genome-based microbial classification in  
64 researchers with little or no taxonomic experience, which may also mislead the bacterial  
65 taxonomy (Baltrus, 2016).

66 A few bacterial identification systems with high resolution have been developed using the  
67 sequence of polymerase chain reaction (PCR) amplified ~4.5 kb long 16S–23S rRNA regions  
68 (Benítez-Páez and Sanz, 2017; Sabat et al. 2017; Kerkhof et al. 2017). However, these  
69 approaches have a few limitations, such as the lack of reference 16S–23S rRNA sequence  
70 databases and complementary bioinformatics resources for reliable species identification  
71 (Sabat et al. 2017). The recent advancements in bioinformatics workflows (Winand et al. 2020;  
72 Schloss, 2020) and reference databases such as SILVA, EzBioCloud (Quast et al. 2013; Yoon,  
73 2017) improved 16S rRNA-based bacterial taxonomy. However, a few recent genome-based  
74 studies highlighted the misclassification incidences in bacterial species and genome assemblies

75 (Steven et al. 2017; Martínez-Romero, et al. 2018; Mateo-Estrada et al. 2019; Bagheri et al.  
76 2020).

77 Nowadays, conventional and high throughput sequencers can amplify all the nine variable  
78 regions of the 16S rRNA gene. Although, many 16S rRNA-based bacterial identification  
79 studies lack a complete set of variable regions (Stackebrandt et al. 2021). The classical and  
80 high throughput sequencing technologies produce a large volume of whole-genome data. There  
81 is an urgent need to translate the genomic data for convenient microbiome analyses that ensure  
82 clinical practitioners can readily understand and quickly implement it (Church et al. 2020).  
83 Hence, we intended to demonstrate the workflow to develop species-specific concatenated 16S  
84 rRNA reference libraries and its applications. The species-specific libraries can yield better  
85 resolution in sequence similarity and phylogeny based bacterial classification approaches.

86

## 87 **Materials and Methods**

### 88 **Estimation of variations in intra-genomic 16S rRNA gene copies**

89 Sequence alignment of 16S rRNA copies at the intra-genomic level shows a higher degree of  
90 variability in species belonging to the *Firmicutes* and *Proteobacteria* (Vetrovsky and Baldrian,  
91 2013; Ibal et al. 2019). Hence, we used eight 16S rRNA copies (Supplementary data 1)  
92 retrieved from the whole-genome of *Enterobacter asburiae* strain ATCC 35953  
93 (NZ\_CP011863.1). The BLAST (Altschul et al. 1990) and Clustal Omega (Sievers et al. 2011)  
94 sequence alignment algorithms were used to estimate intra-genomic variability between the  
95 16S rRNA gene copies. Phylogenetic relatedness between intra-genomic 16S rRNA copies  
96 were estimated using the Maximum Likelihood method (Tamura-Nei model; 500 bootstrap  
97 replicates) with MEGA X software (Kumar et al. 2018).

98

99

## 100 **Construction of species-specific concatenated 16S rRNA reference libraries**

101 Previous studies have reported that several bacterial species shares more than 99% sequence  
102 identity in the 16S rRNA encoding region. Hence, the 16S rRNA-based bacterial identification  
103 methods failed to discriminate such genetically related species (Deurenberg et al. 2017;  
104 Devanga-Ragupathi et al. 2018). It has been reported that *Streptococcus*  
105 *mitis* and *Streptococcus pneumoniae* are almost indistinguishable from each other based on the  
106 sequence similarity of their 16S rRNA regions (Reller et al. 2007; Lal et al. 2011). To develop  
107 species-specific barcode reference libraries, the study used 16S rRNA gene copies from whole-  
108 genome assemblies of four closely related species of *Streptococcus* (*S. gordonii*, *S. mitis*, *S.*  
109 *oralis* and *S. pneumoniae*).

110 More than 385000 whole-genome assemblies are currently available for prokaryotes at  
111 the Genome database (<https://www.ncbi.nlm.nih.gov/genome>). Most microbial genomes were  
112 sequenced with high throughput sequencing technologies such as Illumina/Ion-Torrent (short  
113 read sequencing) and PacBio/Nanopore (long read sequencing). Further, many of these whole-  
114 genome assemblies are derived through a hybrid assembly of short and long read sequence  
115 data. The large volume of high throughput data can be effectively used to develop advanced  
116 genome based approaches for microbial systematics. The genomic data is available in four  
117 assembly completion levels (contig, scaffold, chromosome, and complete). We used only the  
118 genomes assemblies in the 'complete' stage to retrieve 16S rRNA gene copies.

119 The study retrieved full-length 16S rRNA gene copies from 16 genome assemblies  
120 belonging to four *Streptococcus* species (*S. gordonii*, *S. mitis*, *S. oralis*, and *S. pneumoniae*).  
121 The detailed information on the dataset used to develop species-specific concatenated reference  
122 libraries is provided in Table 2 and the sequences are provided in Supplementary data 2. To  
123 maintain the equal length, sequences were trimmed out beyond the universal primer pair fD1 -  
124 5'-GAG TTT GAT CCT GGC TCA-3' and rP2 - 5'-ACG GCT AAC TTG TTA CGA CT-3'

125 (Weisburg et al. 1991) for full-length *in silico* 16S rDNA amplification. We used MEGA X  
126 software to perform multiple sequence alignment and identify the intra-species Parsimony  
127 informative (Parsim-info) variable sites. A species-specific barcode reference library covering  
128 entire Parsim-info variable sites was constructed by concatenating four 16S rRNA gene copies  
129 representing four different strains of a species. The rationale behind the selection of four copies  
130 for a species-specific barcode reference library is: (i) a maximum of four variations can be  
131 found on a single site, and (ii) earlier studies have shown that the mean 16S rRNA copies per  
132 genome is four (Vetrovsky and Baldrian, 2013).

133

#### 134 **Demonstration of concatenated 16S rRNA in sequence similarity and phylogeny**

135 We discussed a few case studies to demonstrate the classical sequence similarity and  
136 phylogeny-based approaches using concatenated species-specific 16S rRNA reference  
137 sequence libraries. The study selected nine Sanger sequenced 16S rRNA gene shown higher  
138 sequence similarity with multiple species of *Streptococcus*. Web-based BLAST2 program for  
139 aligning two or more sequences was used to estimate the maximum score, total alignment score,  
140 and sequence identity. Single copy of the 16S rRNA region derived through Sanger sequencing  
141 or retrieved from a whole-genome assembly can be considered as ‘Query sequence’. The  
142 concatenated species-specific reference libraries must be provided in the ‘Subject sequence’  
143 section. To perform an accurate phylogenetic analysis, it is mandatory that the target sequence  
144 (length=n bp) have to be concatenated four times (length=n×4 bp), appending next to the last  
145 base. Phylogenetic relatedness was estimated using the Maximum Likelihood method (Tamura-  
146 Nei model; 500 bootstrap replicates) with MEGA X software.

147

148

149

## 150 **Results**

### 151 **Intra-genomic 16S rRNA variations in *Enterobacter asburiae***

152 Historically, sequences of the 16S rRNA gene were used to identify known and new bacterial  
153 species. However, this method is impacted by several factors such as amplification efficiency,  
154 poor discriminatory power at the species level, multiple polymorphic 16S rRNA gene copies,  
155 and improper bioinformatics workflows for the data analysis. The genome have eight 16S  
156 rRNA gene copies that showed a mean identity of 99.29% in sequence alignment using Clustal  
157 Omega (global alignment), whereas BLAST (local alignment) analysis resulted in an average  
158 of 99% identity between the copies (Table 1). Hence, the selection of an appropriate algorithm  
159 have a significant role in the estimation of percent identity, and a vital role in sequence-based  
160 species delineation. Global sequence alignment programs generally perform better for highly  
161 identical sequence pairs, and the algorithm considers all the bases for the estimation of  
162 sequence identity. The multiple sequence alignment showed 22 variable sites in 16S rRNA  
163 gene copies of *E. asburiae* genome (Fig. 1).

164 The evolutionary relationship between species is usually represented in a phylogenetic  
165 tree drawn using a single barcode gene, multiple genes, or whole genomes. However, bacterial  
166 species nomenclature is mainly designated based on the confidence obtained from the  
167 phylogenetic tree derived through single copy 16S rRNA analysis. To highlight how the intra-  
168 genomic variations of 16S rRNA copies influence the single gene phylogeny for species  
169 delineation. We constructed a phylogenetic tree using eight 16S rRNA gene copies of *E.*  
170 *asburiae* reference genome showing multiple nodes (Fig. 2). The sequence similarity and  
171 phylogeny-based analysis indicate that the intra-genomic variations in 16S rRNA copies may  
172 mislead the bacterial taxonomy in single gene copy approaches.

173

174

## 175 **Species-specific concatenated 16S rRNA libraries**

176 We selected four *Streptococcus* species (*S. gordonii*, *S. mitis*, *S. oralis*, and *S. pneumoniae*) to  
177 construct species-specific concatenated 16S rRNA reference libraries. The study used four  
178 whole genome assemblies in the ‘complete’ stage to construct a species-specific barcode  
179 library. Four copies of 16S rRNA gene is required to construct the concatenated library for a  
180 species. The details of constructed species-specific libraries is listed in Table 2 and the  
181 sequence is provided in Supplementary data 3. The 16S rRNA sequence analysis shows 24  
182 Parsim-info variable sites for *S. oralis*, 11 variations in *S. mitis*, seven variations in *S. gordonii*,  
183 and six variations found in *S. pneumoniae*.

184 The study used full-length 16S rRNA copies from four different strains to highlight the  
185 variations at the species level. The observed intra-species Parsim-info variable sites reside on  
186 both conserved and variable regions of 16S rRNA gene. Species-specific concatenated 16S  
187 rRNA reference library can be developed with limited number of variable regions. Intra-species  
188 variation on 16S rRNA gene copies influences the sequence based bacterial taxonomy. Hence,  
189 concatenated 16S rRNA approach yield better resolution than single copy analysis in classical  
190 sequence similarity and phylogeny based species identification approaches.

191

## 192 **Demonstration of concatenated 16S rRNA based species identification**

193 The study compared nine 16S rRNA sequences representing *Streptococcus* species (Table 3)  
194 with species-specific concatenated reference libraries. Concatenated sequence analysis gives  
195 better resolution in sequence similarity search and phylogenetics analysis. The sequence  
196 accession numbers GU470907.1 and KF933785.1 classified as *S. mitis* showed a higher  
197 maximum and total alignment score with *S. oralis* than *S. mitis* (Table 3). Whereas the  
198 sequence (OM368574.1; classified as *S. mitis*) showed a higher sequence alignment score  
199 with *S. pneumoniae*. The Fig. 3A shows a Maximum Likelihood tree of the nine 16S rRNA



200 gene sequences with four concatenated species-specific reference libraries. The concatenated  
201 GU470907.1 and KF933785.1 sequences showed phylogenetic relationship with *S. oralis* and  
202 sequence OM368574.1 genetically related with *S. pneumoniae*. These results indicate that the  
203 species-specific concatenated 16S rRNA reference libraries have great potential in the  
204 taxonomy of genetically related species. Hence, the study suggests the usage of concatenated  
205 variable 16S rRNA copies for sequence similarity and phylogeny-based species identification.  
206 Species-specific reference library with concatenated 16S rRNA gene copies provides better  
207 resolution in phylogenetic analysis than the single copy inference.

208

## 209 **Discussion**

210 The 16S rRNA encoding region sequences are considered a conventional and robust method  
211 for identifying the bacterial species. The barcode gene is widely used in sequence similarity,  
212 phylogeny, and metagenome based species identification. Recently, Church et al. (2020)  
213 reviewed in detail the Sanger sequencing of 16S rRNA gene, sequence data analysis, and result  
214 interpretation. However, discrimination of closely related species identification through  
215 sequences of 16S rRNA gene is a challenge, and it may lead to species misidentifications  
216 (Boudewijns et al. 2006). The 16S rRNA gene copies can vary from 1 to 15 in a genome, and  
217 the copy number of variations is taxon-specific (Vetrovsky and Baldrian, 2013). The 16S rRNA  
218 sequence variation found at intra-genomic level and between the strains of a species as well.  
219 Sequence diversity increases with the increasing 16S rRNA copy numbers. About 15% of the  
220 genomes have only a single copy of the 16S rRNA gene, and only a minority of bacterial  
221 genomes harbours identical 16S rRNA gene copies (Vetrovsky and Baldrian, 2013).  
222 Amplification of limited number of variable regions cannot achieve the taxonomic resolution  
223 achieved by sequencing the entire gene (Johnson et al. 2019). Usage of misclassified 16S rRNA  
224 sequences as a reference and inappropriate bioinformatics workflows also mislead the

225 taxonomic assignment.

226         Several bioinformatics resources are extensively used for the 16S rRNA sequence  
227 analysis and bacterial identification. However, several researchers report the sequence  
228 similarity derived through a local alignment algorithm. Earlier reports have suggested that the  
229 species belonging to the taxa Gammaproteobacteria show higher intra-species variability  
230 (Vetrovsky and Baldrian, 2013). Hence, we estimated the percent identity of intra-genomic 16S  
231 rRNA gene copies of *Enterobacter asburiae* using local and global alignment algorithms. The  
232 reference genome of *E. asburiae* has eight 16S rRNA gene copies in its genome. The BLAST  
233 and Clustal sequence alignment algorithms yielded marginally varying results for the intra-  
234 genomic 16S rRNA gene copies. Local alignment algorithms may not consider base  
235 mismatches at the sequence ends for calculating percent identity, while global alignment  
236 algorithms consider entire bases. Therefore, we suggest that global sequence alignment is best  
237 for estimating intra and inter-species identity for single gene copies. However, BLAST can  
238 calculate the total alignment score with multiple paralogues regions. Hence, we suggest  
239 BLAST2 for estimating the sequence similarity using concatenated barcode reference  
240 libraries.

241         The GenBank (Leray et al. 2019) and NCBI 16S database for bacteria (Winand et al.  
242 2020) are reliable for species-level identification and classification. However, few earlier  
243 studies have been highlighted the misclassification of species and genome assemblies at public  
244 genetic databases (Parks et al. 2018; Varghese et al. 2015). For example, the 16S rRNA  
245 sequence (Ac. No. LT707617) shows the organism as *Streptococcus mitis*. Conventional  
246 BLAST-based sequence similarity search shows the highest identity of 99.60% with *S.*  
247 *mitis* 16S rRNA sequence (Ac. No. AB002520). However, the 16S rRNA sequence (Ac. No.  
248 LT707617) did not show significant similarity with other 16S rRNA reference sequences  
249 available for *S. mitis*. Further, the sequence also shows 99.44% identity with reference 16S

250 rRNA sequences of *S. gordonii*. Hence, we performed a sequence alignment of the sequence  
251 (Acc. No. LT707617) against species-specific concatenated 16S rRNA reference libraries  
252 for *S. gordonii* (*S.gordonii*-Ref-I), and *S. mitis* (*S.mitis*-Ref-I). The alignment resulted in a  
253 significant identity of 99.44% with *S.gordonii*-Ref-I (2279 maximum and 9041 total alignment  
254 score) than *S.mitis*-Ref-I (97.13% identity with 2119 maximum and 8449 total alignment  
255 score). Single copy BLAST results may show only a minor fraction of the difference in percent  
256 identity and maximum or total alignment score for closely related species. However, sequence  
257 similarity estimation using species-specific concatenated reference libraries shows a significant  
258 difference in total alignment score, as it is aligned against four copies. Hence, 16S rRNA  
259 analysis with species-specific concatenated barcode reference library will give better accuracy  
260 for bacterial classification than approaches using a single copy.

261         Several 16S rRNA sequences show 100% identity with multiple species, which is the  
262 major challenge in sequence-based species identification. For example, 16S rRNA sequence  
263 from *S. mitis* sequence (Ac. No. GU470907.1; 1522 bp) share 100% identity with 16S rRNA  
264 gene from *S. oralis* strain ATCC 35037 genome (Ac. No. CP034442.1). Hence, we compared  
265 the sequence (GU470907.1) against the species-specific concatenated reference libraries for *S.*  
266 *oralis* (*S.oralis*-Ref-I), and *S. mitis* (*S.mitis*-Ref-I). The result showed 100% identity with *S.*  
267 *oralis* (2787 maximum and 10936 total alignment score), and 99.14% identity with *S.*  
268 *mitis* (2715 maximum and 10796 total alignment score). Further, we plotted a phylogenetic  
269 tree of GU470907 (1509 x 4 = 6036 bp) with reference libraries *S.mitis*-Ref-I, and *S.oralis*-  
270 Ref-I. The Maximum Likelihood-based phylogenetic tree showed that the *S.*  
271 *mitis* (GU470907.1) sequence is closely related to *S. oralis* than *S. mitis* (Fig. 3B).  
272 Concatenated 16S rRNA-based estimation of sequence similarity and a phylogenetic inference  
273 provides resolution than single-gene approaches. These results show that concatenated 16S  
274 rRNA approach is very effective in discriminating genetically related bacterial species. Further,

275 other studies also highlighted that the phylogenetic tree inferred from vertically inherited  
276 protein sequence concatenation provided higher resolution than those obtained from a single  
277 copy (Ciccarelli et al. 2006; Thiergart et al. 2014).

278         Recent phylogenetic studies using concatenated multi-gene sequences data highlighted  
279 the importance of incorporating variation in gene histories and which will improve the  
280 traditional phylogenetic inferences (Devulder et al. 2005; Johnston et al. 2019). As a cost-  
281 effective approach, we combine substantial variations in 16S rRNA gene copies from a species  
282 to examine the performance of the single gene concatenation approach. Analysis using  
283 concatenated 16S rRNA gene approach have some advantages: (i) the gene is present in all the  
284 bacterial species, (ii) the gene is weakly affected by horizontal gene transfer, (iii) the approach  
285 is very cost-effective, (iv) large volume of reference genomic data available for several  
286 bacterial species, (v) effective to discriminate closely related bacterial species, and (vi)  
287 availability of bioinformatics resources for data analytics.

288         Sequencing and analysis of the 16S rRNA gene region is considered the gold standard for  
289 identifying and classifying the bacterial population. The accuracy of bacterial taxonomy based  
290 on 16S rRNA barcode regions is limited by the intra-genomic heterogeneity of multiple 16S  
291 rRNA gene copies and significant sequence identity of this gene between the closely related  
292 taxa. Overcoming these challenges, clinical laboratories are looking forward to translating high  
293 throughput microbial genomic data into meaningful, actionable information that clinicians can  
294 readily understand and quickly implement for bacterial identification. We suggest not to rely  
295 upon one type of analysis, instead and to a certain extent, integrated bioinformatics approaches  
296 can avoid misclassification. Developing a species-specific catalogue of concatenated 16S  
297 rRNA gene copies for the sequence similarity and phylogenetic studies will give better  
298 inference and can be used even in mapping-based metagenome approaches.

299

## 300 **Conclusion**

301 The concatenated 16S rRNA analysis drew the following suggestions:

- 302 • Full-length 16S rRNA gene amplification provides better accuracy than inference from  
303 a partial gene with a limited number of variable sites.
- 304 • Prior to the analysis, trim the bases beyond the primer ends and correct the base-call  
305 errors, which will avoid several mismatches in the sequence alignment.
- 306 • Estimation of mean 16S rRNA identity at the intra-species level helps to classify the  
307 species having a higher degree of intra-genomic 16S rRNA heterogeneity.
- 308 • Use full-length 16S rRNA gene copies from whole-genome assemblies (in 'complete'  
309 stage) rather than partial sequences available at the public genetic databases to construct  
310 species-specific concatenated 16S rRNA libraries and further downstream analysis.
- 311 • Distinct four 16S rRNA gene copies cover all the Parsim-Info variable sites of a species  
312 can be used to construct concatenated species-specific reference library.
- 313 • The total alignment score can be considered, if the query sequence shows more or less  
314 the same percent identity with multiple species.
- 315 • Do not rely only on sequence similarity; make a final decision based on the  
316 phylogenetic inference.

317

## 318 **References**

- 319 Alachiotis N, Vogiatzi E, Pavlidis P, Stamatakis A (2013) Chromatogate: a tool for detecting  
320 base mis-calls in multiple sequence alignments by semi-automatic chromatogram  
321 inspection. *Comput Struct Biotechnol J* 6: e201303001.  
322 <https://doi.org/10.5936/csbj.201303001>.
- 323 Altschul SF, Gish W, Miller W, Myers EW, Lipman DJ (1990) Basic local alignment search  
324 tool. *J Mol Biol* 215: 403-410. [https://doi.org/10.1016/S0022-2836\(05\)80360-2](https://doi.org/10.1016/S0022-2836(05)80360-2).
- 325 Bagheri H, Severin AJ, Rajan H (2020) Detecting and correcting misclassified sequences in the  
326 large-scale public databases. *Bioinformatics* 36: 4699-4705.  
327 <https://doi.org/10.1093/bioinformatics/btaa586>.
- 328 Baltrus DA (2016) Divorcing strain classification from species names. *Trends Microbiol* 24:  
329 431-439. <https://doi:10.1016/j.tim.2016.02.004>.

- 330 Benitez-Paez A, Sanz Y (2017) Multi-locus and long amplicon sequencing approach to study  
331 microbial diversity at species level using the MinION™ portable Nanopore sequencer.  
332 *Gigascience* 6: 1-12. <https://doi.org/10.1093/gigascience/gix043>.
- 333 Boudewijns M, Bakkers JM, Sturm PDJ, Melchers WJG (2006) 16S rRNA gene sequencing  
334 and the routine clinical microbiology laboratory: A perfect marriage? *J Clin Microbiol*  
335 44: 3469-3470. <https://doi.org/10.1128/JCM.01017-06>.
- 336 Church DL, Cerutti L, Gürtler A, Griener T, Zelazny A, Emler S (2020) Performance and  
337 application of 16S rRNA gene cycle sequencing for routine identification of bacteria in  
338 the clinical microbiology laboratory. *Clin Microbiol Rev* 33: e00053-19.  
339 <https://doi.org/10.1128/CMR.00053-19>.
- 340 Ciccarelli FD, Doerks T, von Mering C, Creevey CJ, Snel B, Bork P (2006) Toward automatic  
341 reconstruction of a highly resolved tree of life. *Science* 311: 1283-1287.  
342 <https://doi.org/10.1126/science.1123061>.
- 343 Clarridge JE (2004) Impact of 16S rRNA gene sequence analysis for identification of bacteria  
344 on clinical microbiology and infectious diseases. *Clin Microbiol Rev* 17: 840-862.  
345 <https://doi.org/10.1128/CMR.17.4.840-862.2004>.
- 346 Deurenberg RH, Bathoorn E, Chlebowicz MA, Couto N, Ferdous M, García-Cobos S, et al  
347 (2017) Application of next generation sequencing in clinical microbiology and infection  
348 prevention. *J Biotechnol* 243: 16-24. <https://doi.org/10.1016/j.jbiotec.2016.12.022>.
- 349 Devanga-Ragupathi NK, Muthuirulandi SDP, Inbanathan FY, Veeraraghavan B (2018)  
350 Accurate differentiation of *Escherichia coli* and *Shigella* serogroups: challenges and  
351 strategies. *New Microbes New Infect* 2: 58-62.  
352 <https://doi.org/10.1016/j.nmni.2017.09.003>.
- 353 Devulder G, de Montclos MP, Flandrois JP (2005) A multigene approach to phylogenetic  
354 analysis using the genus *Mycobacterium* as a model. *Int J Syst Evol Microbiol* 55: 293-  
355 302. <https://doi.org/10.1099/ijs.0.63222-0>.
- 356 Ibal JC, Pham HQ, Park CE, Shin JH (2019) Information about variations in multiple copies of  
357 bacterial 16S rRNA genes may aid in species identification. *PLoS One* 14: e0212090.  
358 <https://doi.org/10.1371/journal.pone.0212090>.
- 359 Janda JM, Abbott SL (2007) 16S rRNA gene sequencing for bacterial identification in the  
360 diagnostic laboratory: Pluses, perils, and pitfalls. *J Clin Microbiol* 45: 2761-2764.  
361 <https://doi.org/10.1128/JCM.01228-07>.
- 362 Johnson JS, Spakowicz DJ, Hong BY, Petersen LM, Demkowicz P, Chen L, et al (2019)  
363 Evaluation of 16S rRNA gene sequencing for species and strain-level microbiome  
364 analysis. *Nat Commun* 10: 1-11. <https://doi.org/10.1038/s41467-019-13036-1>.
- 365 Johnston PR, Quijada L, Smith CA, Baral HO, Hosoya T, Baschien C, et al (2019) A multigene  
366 phylogeny toward a new phylogenetic classification of *Leotiomyces*. *IMA Fungus* 10,  
367 1. <https://doi.org/10.1186/s43008-019-0002-x>.
- 368 Kerkhof LJ, Dillon KP, Haggblom MM, McGuinness LR (2017) Profiling bacterial  
369 communities by MinION sequencing of ribosomal operons. *Microbiome* 5: 116.  
370 <https://doi.org/10.1186/s40168-017-0336-9>.
- 371 Kumar S, Stecher G, Li M, Knyaz C, Tamura K (2018) MEGA X: Molecular evolutionary  
372 genetics analysis across computing platforms. *Mol Biol Evol* 8: 1829.  
373 <https://doi.org/10.1093/molbev/msy096>.
- 374 Lal D, Verma M, Lal R (2011) Exploring internal features of 16S rRNA gene for identification

- 375 of clinically relevant species of the genus *Streptococcus*. *Ann Clin Microbiol*  
376 *Antimicrob* 10: 28. <https://doi.org/10.1186/1476-0711-10-28>.
- 377 Leray M, Knowlton N, Ho SL, Nguyen BN, Machida RJ (2019) GenBank is a reliable resource  
378 for 21<sup>st</sup> century biodiversity research. *Proc Natl Acad Sci USA* 116: 22651-22656.  
379 <https://doi.org/10.1073/pnas.1911714116>.
- 380 Liu Y, Lai Q, Shao Z (2018) Genome analysis-based reclassification of *Bacillus*  
381 *weihenstephanensis* as a later heterotypic synonym of *Bacillus mycoides*. *Int J Syst Evol*  
382 *Microbiol* 68: 106-112. <https://doi.org/10.1099/ijsem.0.002466>.
- 383 Martínez-Romero E, Rodríguez-Medina N, Beltrán-Rojel M, Silva-Sánchez J, Barrios-  
384 Camacho H, Pérez-Rueda E, et al (2018) Genome misclassification of *Klebsiella*  
385 *variicola* and *Klebsiella quasipneumoniae* isolated from plants, animals and humans.  
386 *Salud Publica Mex* 60: 56-62. <https://doi.org/10.21149/8149>.
- 387 Mateo-Estrada V, Grana-Miraglia L, Lopez-Leal G, Castillo-Ramirez S (2019) Phylogenomics  
388 reveals clear cases of misclassification and genus-wide phylogenetic markers for  
389 *Acinetobacter*. *Genome Biol Evol* 11: 2531-2541. <https://doi.org/10.1093/gbe/evz178>.
- 390 Parks DH, Waite DW, Skarshewski A, Chuvochina M, Rinke C, Hugenholtz P, et al (2018) A  
391 standardized bacterial taxonomy based on genome phylogeny substantially revises the  
392 tree of life. *Nat Biotechnol* 36: 996-1004. <https://doi.org/10.1038/nbt.4229>.
- 393 Paul B, Dixi G, Murali TS, Satyamoorthy K (2019) Genome-based taxonomic classification.  
394 *Genome* 62: 45-52. <https://doi.org/10.1139/gen-2018-0072>.
- 395 Peker N, Garcia-Croes S, Dijkhuizen B, Wiersma HH, Van Zanten E, Wisselink G, et al (2019)  
396 A comparison of three different bioinformatics analyses of the 16S-23S rRNA encoding  
397 region for bacterial identification. *Front Microbiol* 10: 620.  
398 <https://doi.org/10.3389/fmicb.2019.00620>.
- 399 Quast C, Pruesse E, Yilmaz P, Gerken J, Schweer T, Yarza P, et al (2013) The SILVA ribosomal  
400 RNA gene database project: improved data processing and web-based tools. *Nucleic*  
401 *Acids Res* 41: D590-D596. <https://doi.org/10.1093/nar/gks1219>.
- 402 Reller LB, Weinstein MP, Petti CA (2007) Detection and identification of microorganisms by  
403 gene amplification and sequencing. *Clin Infect Dis* 44: 1108-1114.  
404 <https://doi.org/10.1086/512818>.
- 405 Sabat AJ, van Zanten E, Akkerboom V, Wisselink G, van Slochteren K, de Boer RF, et al (2017)  
406 Targeted next-generation sequencing of the 16S-23S rRNA region for culture-  
407 independent bacterial identification increased discrimination of closely related species.  
408 *Sci Rep* 7: 1-12. <https://doi.org/10.1038/s41598-017-03458-6>.
- 409 Schloss PD (2020) Reintroducing mothur: 10 Years Later. *Appl Environ Microbiol* 86: e02343-  
410 19. <https://doi.org/10.1128/AEM.02343-19>.
- 411 Sievers F, Wilm A, Dineen D, Gibson TJ, Karplus K, Li W, et al (2011) Fast, scalable generation  
412 of high-quality protein multiple sequence alignments using Clustal Omega. *Mol Syst*  
413 *Biol* 7: 539. <https://doi.org/10.1038/msb.2011.75>.
- 414 Srinivasan R, Karaoz U, Volegova M, MacKichan J, Kato-Maeda M, Miller S, et al (2015) Use  
415 of 16S rRNA gene for identification of a broad range of clinically relevant bacterial  
416 pathogens. *PLoS One* 10: e0117617. <https://doi.org/10.1371/journal.pone.0117617>.
- 417 Stackebrandt E, Mondotte JA, Fazio LL, Jetten M (2021) Authors need to be prudent when  
418 assigning names to microbial isolates. *Arch Microbiol* 203: 5845-5848.  
419 <https://doi.org/10.1007/s00203-021-02599-7>

- 420 Starke R, Pylro VS, Morais DK (2021) 16S rRNA gene copy number normalization does not  
421 provide more reliable conclusions in metataxonomic surveys. *Microb Eco* 81: 535-539.  
422 <https://doi.org/10.1007/s00248-020-01586-7>.
- 423 Steven B, Hesse C, Soghigian J, Gallegos-Graves V, Dunbar J (2017) Simulated rRNA/DNA  
424 ratios show potential to misclassify active populations as dormant. *Appl Environ*  
425 *Microbiol* 83: e00696-17. <https://doi.org/10.1128/AEM.00696-17>.
- 426 Thiergart T, Landan G, Martin WF (2014) Concatenated alignments and the case of the  
427 disappearing tree. *BMC Evol Biol* 14: 1-12. [https://doi.org/10.1186/s12862-014-0266-](https://doi.org/10.1186/s12862-014-0266-0)  
428 0.
- 429 Varghese NJ, Mukherjee S, Ivanova N, Konstantinidis KT, Mavrommatis K, Kyrpides NC, et  
430 al (2015) Microbial species delineation using whole genome sequences. *Nucleic Acids*  
431 *Res* 43: 6761-6771. <https://doi.org/10.1093/nar/gkv657>.
- 432 Vetrovsky T, Baldrian P (2013) The variability of the 16S rRNA gene in bacterial genomes and  
433 its consequences for bacterial community analyses. *PLoS One* 8: e57923.  
434 <https://doi.org/10.1371/journal.pone.0057923>.
- 435 Weisburg WG, Barns SM, Pelletier DA, Lane DJ (1991) 16S ribosomal DNA amplification for  
436 phylogenetic study. *J Bacteriol* 173: 697-703. [https://doi.org/10.1128/jb.173.2.697-](https://doi.org/10.1128/jb.173.2.697-703.1991)  
437 703.1991.
- 438 Winand R, Bogaerts B, Hoffman S, Lefevre L, Delvoye M, van Braekel J, et al (2020) Targeting  
439 the 16S rRNA gene for bacterial identification in complex mixed samples: Comparative  
440 evaluation of second (Illumina) and third (Oxford Nanopore technologies) generation  
441 sequencing technologies. *Int J Mol Sci* 21: 298. <https://doi.org/10.3390/ijms21010298>.
- 442 Yoon SH, Ha SM, Kwon S, Lim J, Kim Y, Seo H, et al (2017) Introducing EzBioCloud: a  
443 taxonomically united database of 16S rRNA gene sequences and whole-genome  
444 assemblies. *Int J Syst Evol Microbiol* 67: 1613-1617.  
445 <https://doi.org/10.1099/ijsem.0.001755>.

446

447

448

449

450

451

452

453

454

455

456



**Table 1.** Percent identity of eight intra genomic 16S rRNA regions from *Enterobacter asburiae* strain ATCC 35953 (NZ\_CP011863.1). Percent identity given below the diagonal line is calculated with Clustal Omega software (Mean identity: 99.29%) and those above the diagonal line was calculated with BLASTN program (Mean identity: 99.00%). Genome coordinates of 16S rRNA copies- R1: 2686082-2687660 (1579 bp); R2: 3148265-3149814 (1550 bp); R3: 3313470-3315019 (1550 bp); R4: 3583942-3585481 (1540 bp); R5:3684745-3686294 (1550 bp); R6: 3771751-3773300 (1550 bp); R7: 3968538-3970087 (1550 bp); R8: 4647650-4649199 (1550 bp)

| 16S rRNA copies | R1    | R2    | R3    | R4    | R5    | R6    | R7    | R8    |
|-----------------|-------|-------|-------|-------|-------|-------|-------|-------|
| <b>R1</b>       |       | 98.10 | 98.04 | 97.47 | 98.04 | 97.47 | 97.59 | 98.04 |
| <b>R2</b>       | 99.10 |       | 99.74 | 99.23 | 99.94 | 99.29 | 99.48 | 99.94 |
| <b>R3</b>       | 98.97 | 99.74 |       | 99.23 | 99.68 | 99.03 | 99.23 | 99.81 |
| <b>R4</b>       | 98.90 | 99.41 | 99.41 |       | 99.16 | 98.52 | 98.71 | 99.29 |
| <b>R5</b>       | 99.03 | 99.94 | 99.68 | 99.35 |       | 99.23 | 99.42 | 99.87 |
| <b>R6</b>       | 98.39 | 99.29 | 99.03 | 98.70 | 99.23 |       | 99.68 | 99.23 |
| <b>R7</b>       | 98.58 | 99.48 | 99.23 | 98.89 | 99.42 | 99.68 |       | 99.42 |
| <b>R8</b>       | 99.03 | 99.94 | 99.81 | 99.48 | 99.87 | 99.23 | 99.42 |       |

**Table 2.** Details of whole genome assemblies used for the development of concatenated 16S rRNA reference libraries. One copy of 16S rRNA gene from each strain is used for the concatenation.

| Species              | Strains       | Genome accession number | No. of 16S rRNA gene copies | Sequencing platform | Species-specific library name | Library length (bp) | No. of Parsim-info sites |
|----------------------|---------------|-------------------------|-----------------------------|---------------------|-------------------------------|---------------------|--------------------------|
| <i>S. gordonii</i>   | FDAARGOS 1454 | CP077224.1              | 4                           | PacBio; Illumina    | <i>S.gordonii</i> -Ref-I      | 6076                | 7                        |
|                      | NCTC7868      | LR134291.1              | 4                           | PacBio              |                               |                     |                          |
|                      | KCOM 1506     | CP012648.1              | 5                           | Illumina            |                               |                     |                          |
|                      | NCTC9124      | LR594041.1              | 4                           | PacBio              |                               |                     |                          |
| <i>S. mitis</i>      | B6            | NC_013853.1             | 4                           | NA                  | <i>S.mitis</i> -Ref-I         | 6033                | 11                       |
|                      | KCOM 1350     | CP012646.1              | 3                           | Illumina            |                               |                     |                          |
|                      | SVGS 061      | CP014326.1              | 4                           | PacBio; Illumina    |                               |                     |                          |
|                      | NCTC 12261    | CP028414.1              | 4                           | PacBio              |                               |                     |                          |
| <i>S. oralis</i>     | NCTC 11427    | LR134336.1              | 4                           | PacBio              | <i>S.oralis</i> -Ref-I        | 6038                | 24                       |
|                      | 34            | CP079724.1              | 4                           | Illumina; Nanopore  |                               |                     |                          |
|                      | FDAARGOS 886  | CP065706.1              | 4                           | PacBio; Illumina    |                               |                     |                          |
|                      | F0392         | CP034442.1              | 4                           | PacBio              |                               |                     |                          |
| <i>S. pneumoniae</i> | 475           | CP046355.1              | 4                           | PacBio              | <i>S.pneumoniae</i> -Ref-I    | 6032                | 6                        |
|                      | NU83127       | AP018936.1              | 4                           | Nanopore; Illumina  |                               |                     |                          |
|                      | NCTC7465      | LN831051.1              | 4                           | PacBio              |                               |                     |                          |
|                      | 6A-10         | CP053210.1              | 4                           | PacBio              |                               |                     |                          |

**Table 3.** Similarity of selected sequences against the concatenated species-specific 16S rRNA reference libraries.

| GenBank Acc. No. | Species              | <i>S. gordonii</i> -Ref-I |             |              | <i>S. mitis</i> -Ref-I |             |              | <i>S. oralis</i> -Ref-I |             |              | <i>S. pneumoniae</i> -Ref-I |             |              |
|------------------|----------------------|---------------------------|-------------|--------------|------------------------|-------------|--------------|-------------------------|-------------|--------------|-----------------------------|-------------|--------------|
|                  |                      | Max Score                 | Total Score | Identity (%) | Max Score              | Total Score | Identity (%) | Max Score               | Total Score | Identity (%) | Max Score                   | Total Score | Identity (%) |
| AJ295848.1       | <i>S. mitis</i>      | 2495                      | 9967        | 96.45        | 2769                   | 11027       | 99.80        | 2758                    | 10851       | 99.67        | 2752                        | 10982       | 99.60        |
| AM157428.1       | <i>S. mitis</i>      | 2462                      | 9845        | 96.05        | 2724                   | 10866       | 99.27        | 2702                    | 10685       | 99.01        | 2708                        | 10805       | 99.07        |
| NR_028664.1      | <i>S. mitis</i>      | 2499                      | 9991        | 96.45        | 2776                   | 10979       | 99.87        | 2750                    | 10864       | 99.54        | 2724                        | 10888       | 99.27        |
| GU470907.1       | <i>S. mitis</i>      | 2536                      | 10096       | 96.91        | 2715                   | 10796       | 99.14        | 2787                    | 10936       | 100          | 2091                        | 10716       | 98.87        |
| KF933785.1       | <i>S. mitis</i>      | 2466                      | 9832        | 96.06        | 2667                   | 10593       | 98.54        | 2673                    | 10650       | 98.61        | 2632                        | 10502       | 98.15        |
| OM368574.1       | <i>S. mitis</i>      | 2475                      | 9896        | 96.24        | 2754                   | 10968       | 99.67        | 2732                    | 10814       | 99.40        | 2760                        | 10990       | 99.73        |
| OM368578.1       | <i>S. pneumoniae</i> | 2475                      | 9896        | 96.24        | 2754                   | 10968       | 99.67        | 2732                    | 10814       | 99.40        | 2760                        | 10990       | 99.73        |
| AM157442.1       | <i>S. pneumoniae</i> | 2470                      | 9863        | 96.12        | 2702                   | 10779       | 99.01        | 2715                    | 10726       | 99.14        | 2702                        | 10777       | 99.01        |
| NR_117719.1      | <i>S. oralis</i>     | 2531                      | 10074       | 96.84        | 2710                   | 10774       | 99.07        | 2787                    | 10925       | 100          | 2697                        | 10739       | 98.94        |

457 **Figure Legends**

458

459 **Fig. 1.** Multiple sequence alignment of eight intra genomic 16S rRNA gene copies from  
460 *Enterobacter asburiae* strain ATCC 35953 (NZ\_CP011863.1) showing 22 variable sites.

461

462 **Fig. 2.** Phylogenetic tree of eight intra genomic 16S rRNA gene copies from *Enterobacter*  
463 *asburiae* strain ATCC 35953 (NZ\_CP011863.1). The node label denotes the coordinate of 16S  
464 rRNA regions in the genome.

465

466 **Fig. 3.** A) Phylogenetic analysis of analysis of randomly selected 16S rRNA sequences  
467 classified as *Streptococcus* species. B) Concatenated 16S rRNA phylogeny of *Streptococcus*  
468 *mitis* sequence (Ac. No. GU470907.1) showed 100% identity with *Streptococcus oralis*  
469 genome (Ac. No. CP034442.1) in BLAST based sequence similarity search. The node name  
470 highlighted in shapes (●, ■, ▲, ◆) represents the four species-specific reference libraries.

## Variable sites and their positions

| Genome coordinates | 400 | 421 | 422 | 435 | 551 | 552 | 561 | 562 | 835 | 932 | 933 | 1103 | 1105 | 1106 | 1107 | 1121 | 1123 | 1125 | 1315 | 1316 | 1501 | 1508 |
|--------------------|-----|-----|-----|-----|-----|-----|-----|-----|-----|-----|-----|------|------|------|------|------|------|------|------|------|------|------|
| 2686082-2687660    | C   | C   | A   | A   | T   | C   | G   | A   | G   | G   | T   | C    | A    | C    | A    | T    | T    | G    | C    | G    | T    | C    |
| 3148265-3149814    | C   | T   | G   | A   | T   | C   | G   | A   | G   | T   | G   | C    | A    | C    | A    | T    | T    | G    | C    | G    | C    | T    |
| 3313470-3315019    | T   | T   | G   | G   | T   | C   | G   | A   | A   | T   | G   | C    | A    | C    | A    | T    | T    | G    | C    | G    | C    | C    |
| 3583942-3585481    | C   | T   | G   | G   | T   | C   | G   | A   | G   | T   | G   | C    | A    | C    | A    | T    | T    | G    | C    | G    | -    | C    |
| 3684745-3686294    | C   | T   | G   | A   | T   | C   | G   | A   | G   | T   | G   | C    | A    | C    | A    | T    | T    | G    | T    | G    | C    | T    |
| 3771751-3773300    | C   | T   | G   | A   | A   | G   | C   | T   | G   | T   | G   | T    | C    | T    | G    | C    | A    | A    | C    | G    | C    | T    |
| 3968538-3970087    | C   | T   | G   | A   | T   | C   | G   | A   | G   | T   | G   | T    | C    | T    | G    | C    | A    | A    | C    | A    | C    | T    |
| 4647650-4649199    | C   | T   | G   | G   | T   | C   | G   | A   | G   | T   | G   | C    | A    | C    | A    | T    | T    | G    | C    | G    | C    | T    |

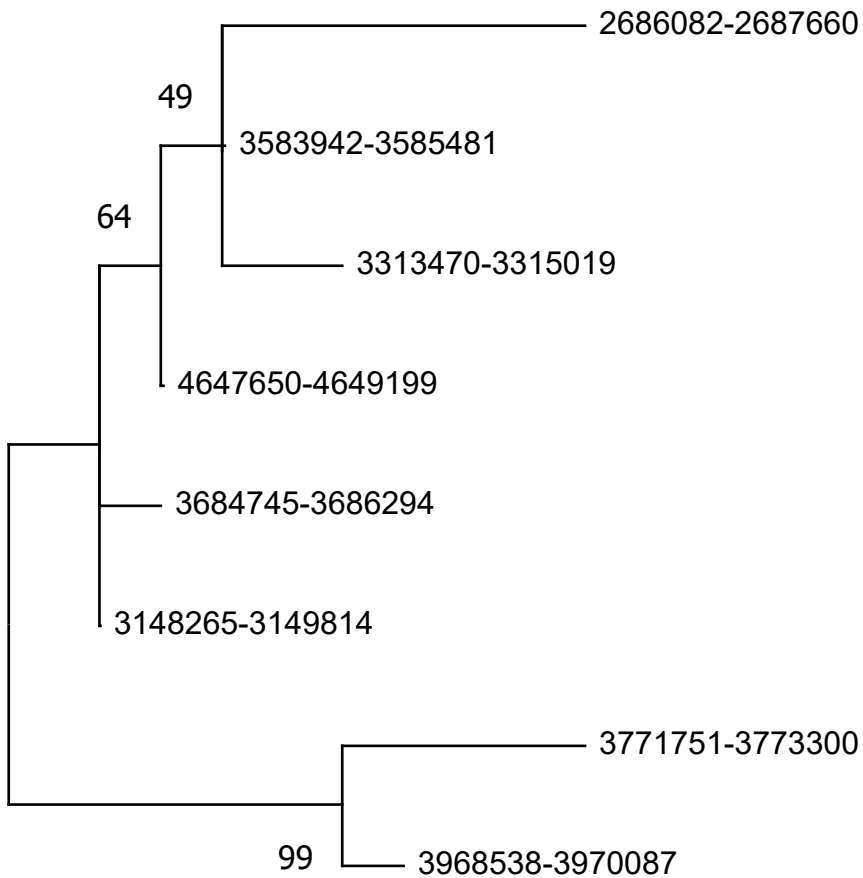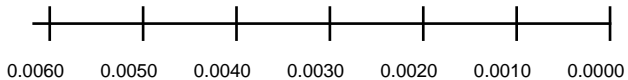

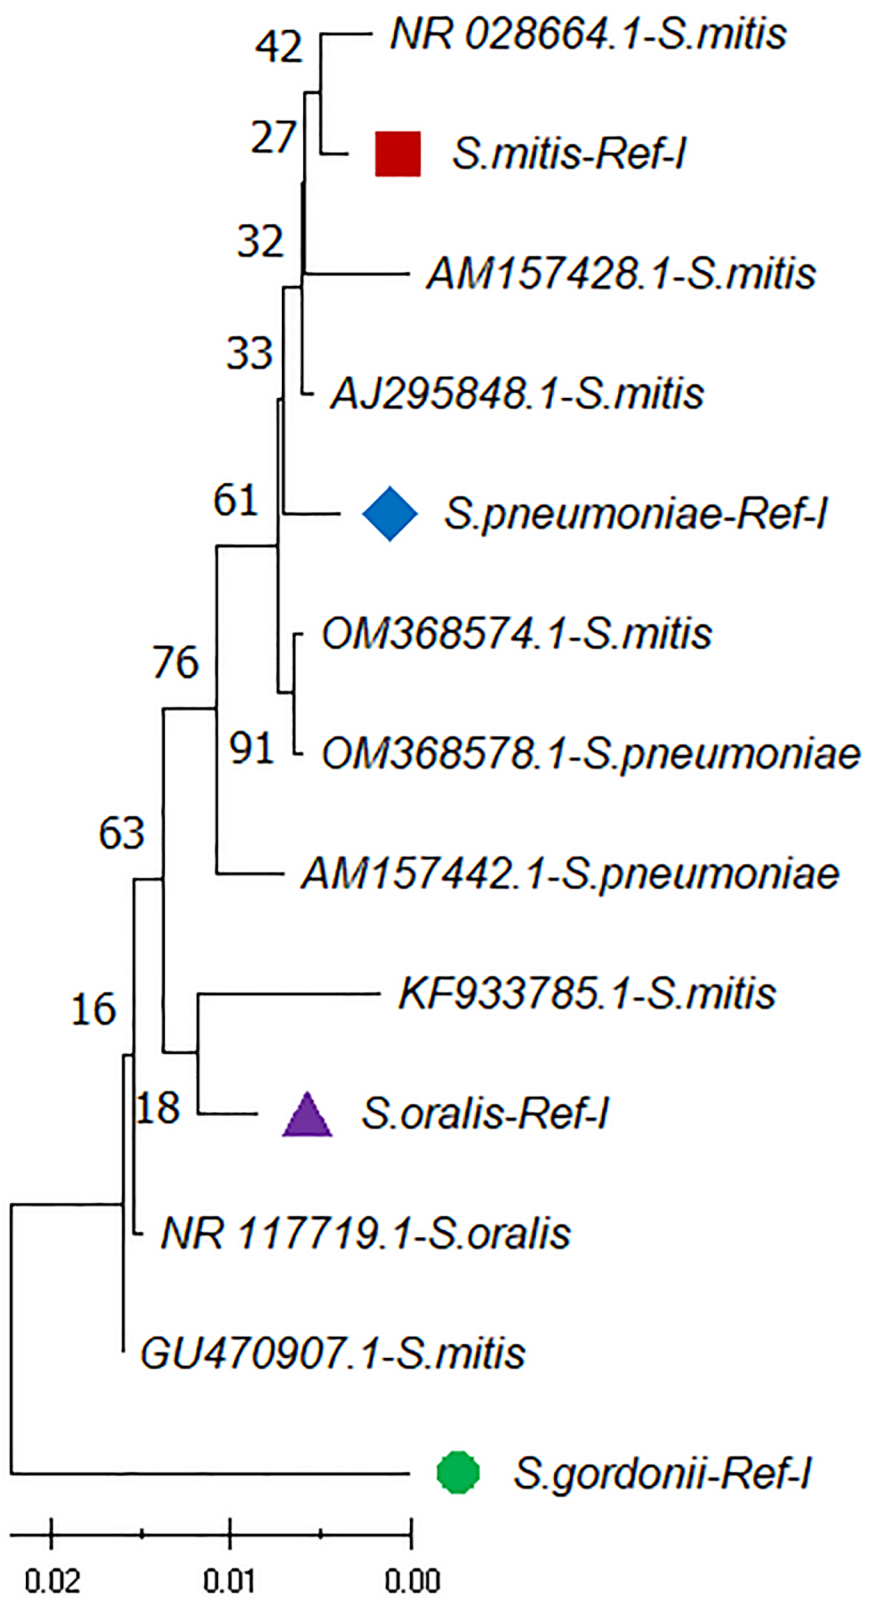

A

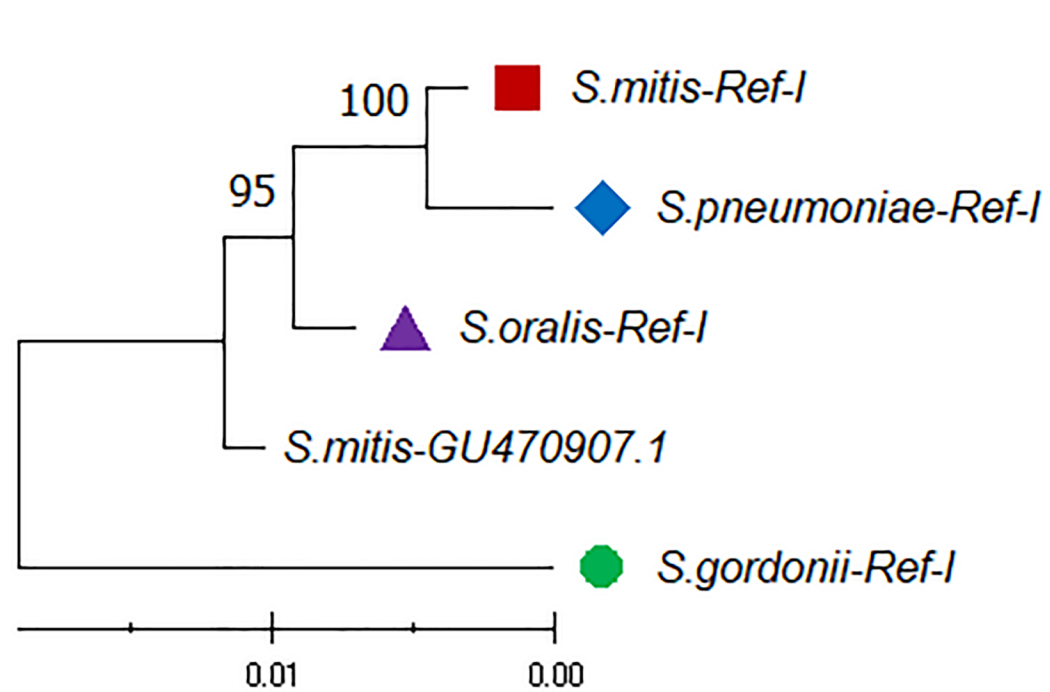

B
